# Supplementary material for: Evaluation of the Soil-Structure Interaction through Environmental Vibration Tests of the Historic Religious Monument Santa Ana located in Barrios Altos, Lima.
Source: Research Square preprint supplement (doi:10.21203/rs.3.rs-6941912/v1), 2025-07-01
Supplement: Supplementary file 1 [file 808b38f890fcdf24c2ade5f0.docx]

**TABLE INDEX**

[**Table 1 Initial values of the mechanical properties of the masonry of the towers.** 1](#_Toc201337097)

[**Table 2. Predominant Period and Amplitude of movement** 1](#_Toc201337098)

[**Table 3. Compilation of data obtained from the MASW trial**. 1](#_Toc201337099)

[**Table 4. Compilation of data obtained from the MAM trial.** 1](#_Toc201337100)

[**Table 5. Average of data obtained from MASW and MAM assay.** 1](#_Toc201337101)

[**Table 6 Results in the direction of Tx.** 2](#_Toc201337102)

[**Table 7 Results in the direction of Tz.** 2](#_Toc201337103)

[**Table 8 Results in the direction of T**. 2](#_Toc201337104)

[**Table 9. Results in the direction of Tx.** 2](#_Toc201337105)

[**Table 10. Results in the direction of Tz.** 2](#_Toc201337106)

[**Table 11. Total displacement results (T).** 3](#_Toc201337107)

[**Table 12. Land classification.** 3](#_Toc201337108)

| **Table 1 Initial values of the mechanical properties of the masonry of the towers.** | | | |
| --- | --- | --- | --- |
| Element | Type of masonry | Modulus of Elasticity  𝐸 (𝑀𝑃𝑎) | Specific Weight𝛾  (𝐾𝑁/𝑚3) |
| Walls | M1 | 522.24 | 16.67 |
| Arch | M2 | 836.22 | 17.65 |
| Dome | M3 | 425.36 | 15.691 |

| **Table 2. Predominant Period and Amplitude of movement** | | | |
| --- | --- | --- | --- |
| Environmental Vibration (HVSR) | Predominant Period (s) | Amplitude H/V | Type of soil |
| HVSR - 1 | 0.129 | 0.409 | S1 |
| HVSR - 2 | 0.169 | 0.755 | S1 |
| HVSR - 3 | 0.165 | 0.630 | S1 |

| **Table 3. Compilation of data obtained from the MASW trial**. | | | | | | | | |
| --- | --- | --- | --- | --- | --- | --- | --- | --- |
| Depth (m) | Vp  (m/s) | Vs  (m/s) | (Tn/m2) | ) | Gd (MPa) | Ed (MPa) | Kd (MPa) |
| 0-5 | 868 | 438 | 1.7 | 0.32 | 343 | 897 | 915 |
| 5-30 | 1916 | 801 | 1.8 | 0.39 | 1194 | 3317 | 5295 |

| **Table 4. Compilation of data obtained from the MAM trial.** | | | | | | | |
| --- | --- | --- | --- | --- | --- | --- | --- |
| Depth (m) | Vp  (m/s) | Vs  (m/s) | (Tn/m2) |  | Gd (MPa) | Ed (MPa) | Kd (MPa) |
| 0-5 | 852 | 467 | 1.7 | 0.30 | 385 | 986 | 763 |
| 5-30 | 1839 | 797 | 1.8 | 0.35 | 1164 | 3177 | 4911 |

| **Table 5. Average of data obtained from MASW and MAM assay.** | | | | | | | | | | |
| --- | --- | --- | --- | --- | --- | --- | --- | --- | --- | --- |
| Depth (m) | | Vp  (m/s) | | Vs  (m/s) | | (Tn/m2) |  | Gd (MPa) | Ed (MPa) | Kd (MPa) |
| 0-5 | 852 | | 467 | | 1.7 | | 0.30 | 385 | 986 | 763 |
| 5-30 | 1839 | | 797 | | 1.8 | | 0.35 | 1164 | 3177 | 4911 |

| **Table 6 Results in the direction of Tx.** | | |
| --- | --- | --- |
| Legend | Range | Percentage distribution of deformations |
| 🔴 Red | 0.7471 – 0.8966 cm | 0.4 % |
| 🟡 Yellow | 0.5977 – 0.7471 cm | 0.7% |
| 🟢 Green | 0.3735 – 0.5977 cm | 1.4% |
| 🔵 Blue | 0.0000 – 0.3735 cm | 79.0% |
| 🔴 Red | 0.7471 – 0.8966 cm | 0.4 % |

| **Table 7 Results in the direction of Tz.** | | |
| --- | --- | --- |
| Legend | Range | Percentage distribution of deformations |
| 🔴 Red | 0.1204 – 0.1445 cm | 0.2 % |
| 🟡 Yellow | 0.0963 – 0.1204 cm | 0.3 % |
| 🟢 Green | 0.0602 - 0.0963 cm | 0.5 % |
| 🔵 Blue | 0.0000 – 0.02409 | 86.4 % |
| 🔴 Red | 0.1204 – 0.1445 cm | 0.2 % |

| **Table 8 Results in the direction of T**. | | |
| --- | --- | --- |
| Legend | Range | Percentage distribution of deformations |
| 🔴 Red | 0.7499 – 0.8996 cm | 0.4 % |
| 🟡 Yellow | 0.5999 - 0.7499 cm | 0.7 % |
| 🟢 Green | 0.2999 – 0.5999 cm | 1.6 % |
| 🔵 Blue | 0.0000 – 0.2999 cm | 76.0 % |

| **Table 9. Results in the direction of Tx.** | | |
| --- | --- | --- |
| Legend | Range | Percentage distribution of deformations |
| 🔴 Red | 0.1204 – 0.1445 cm | 1.2 % |
| 🟡 Yellow | 0.0963 – 0.1204 cm | 2.7 % |
| 🟢 Green | 0.0602 - 0.0963 cm | 3.6 % |
| 🔵 Blue | 0.0000 – 0.02409 cm | 34.4 % |

| **Table 10. Results in the direction of Tz.** | | |
| --- | --- | --- |
| Legend | Range | Percentage distribution of deformations |
| 🔴 Red | 0.1204 – 0.1445 cm | 0.5 % |
| 🟡 Yellow | 0.0963 – 0.1204 cm | 0.8 % |
| 🟢 Green | 0.0602 - 0.0963 cm | 1.5 % |
| 🔵 Blue | 0.0000 – 0.02409 cm | 57.7 % |

| **Table 11. Total displacement results (T).** | | |
| --- | --- | --- |
| Legend | Range | Percentage distribution of deformations |
| 🔴 Red | 0.1204 – 0.1445 cm | 24.6 % |
| 🟡 Yellow | 0.0963 – 0.1204 cm | 13.9 % |
| 🟢 Green | 0.0602 - 0.0963 cm | 10.2 % |
| 🔵 Blue | 1. – 0.02409 cm | 4.3% |

| **Table 12. Land classification.** | | | |
| --- | --- | --- | --- |
| **Test MASW y MAM** | **Vs30** | **Soil classification according to velocity Vs30** | |
| **IBC, 2018 – ASCE 2010** | **NTP E-030 2018** |
| MASW-1 | 747 | **TIPO C:** It would adopt the behavior of a very dense soil or soft rock. | **TIPO S1:** Corresponds to rock or very rigid soil. |
| MASW – 2 | 682 | **TIPO C:** It would adopt the behavior of a very dense soil or soft rock. | **TIPO S1:** Corresponds to rock or very rigid soil. |
| MASW – 2 | 709 | **TIPO C:** It would adopt the behavior of a very dense soil or soft rock. | **TIPO S1:** Corresponds to rock or very rigid soil. |
| MAM – 1 | 737 | **TIPO C:** It would adopt the behavior of a very dense soil or soft rock. | **TIPO S1:** Corresponds to rock or very rigid soil. |
| MAM – 2 | 731 | **TIPO C:** It would adopt the behavior of a very dense soil or soft rock. | **TIPO S1:** It would adopt the behavior of a very dense soil or soft rock. |
